# Supplementary material for: Bifidobacterium animalis subsp. lactis BPL1™ and Its Lipoteichoic Acid Modulate Longevity and Improve Age/Stress-Related Behaviors in Caenorhabditis elegans
Source: MDPI journal article supplement (doi:10.3390/antiox12122107), 2023-12-13
Supplement: s1 [file s1]

## Supplementary Materials

Figure S1 includes the results of the analysis of different LTA from BPL1<sup>TM</sup> doses in the pathogen infection assay of *C. elegans* (*S. aureus*) (A) and the positive dose response effect of LTA from BPL1<sup>TM</sup> in the *C. elegans*' Alzheimer's Disease model (B).

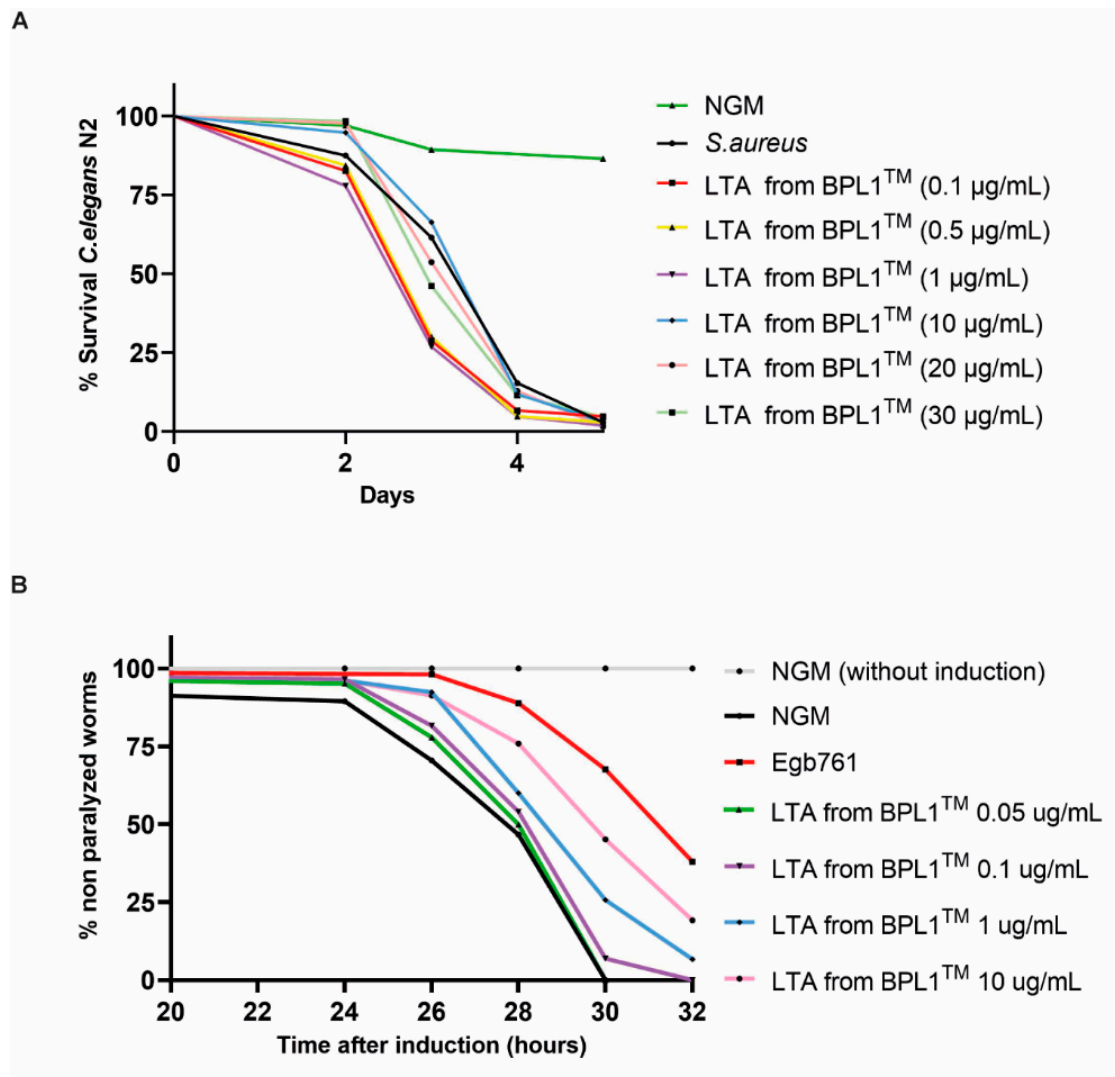

**Figure S1. (A)** Dose-Response of survival rate of N2 wild type nematodes fed with *E. coli* OP50 strain, *S. aureus* ATCC 25923 strain and different doses of LTA from BPL1<sup>TM</sup>. No statistical differences observed. Data are the average of two independent experiments (n = 100/condition). Log Rank T-test was applied. **(B)** Percentage of CL4176 non-paralyzed worms fed different doses of LTA from BPL1<sup>TM</sup>. Optimal dose 10 µg/mL ( $p < 0.0001$ ). Data correspond to two independent assays (n = 100/condition). Log Rank *t*-test was applied.
